# Supplementary material for: Does kidney transplantation with a standard or expanded criteria donor improve patient survival? Results from a Belgian cohort
Source: PubMed Central journal article supplement (PMC8075371; doi:10.1093/ndt/gfab024), 2021-02-26
Supplement: gfab024_supplementary_data.pdf [file gfab024_supplementary_data.pdf]

### Supplementary table 1: Donor characteristics

Data are presented as number of patients (percentage) or as median (25-75 percentile), unless indicated otherwise

Abbreviations: TX: transplantation, SCD: standard criteria donors, ECD: expanded criteria donors, CVA: cerebrovascular accident, DBD: donation after brain death, DCD: donation after circulatory death, KDRI: kidney donor risk index, CIT: cold ischemia time. P-value\*: comparing SCD and ECD transplantation. <sup>a</sup>: KDRI calculated using the formula by Rao et al. based on the 10 donor-derived factors (Rao PS, Schaubel DE, Guidinger MK, et al. A comprehensive risk quantification score for deceased donor kidneys: the kidney donor risk index. *Transplantation*. 2009;88(2):231-236.)

|                                          | <b>TOTAL TX<br/>N=3382</b> | <b>SCD<br/>N=2666</b> | <b>ECD<br/>N=716</b> | <b>p-<br/>value*</b> |
|------------------------------------------|----------------------------|-----------------------|----------------------|----------------------|
| <b>Age(years)</b>                        | 47 (36-56)                 | 43 (31-51)            | 62 (60-66)           | <0.0001              |
| <b>Male sex</b>                          | 1910 (56)                  | 1576 (59)             | 334 (47)             | <0.0001              |
| <b>Hypertension history:</b>             |                            |                       |                      |                      |
| <b>Yes</b>                               | 711 (21)                   | 325 (12)              | 386 (54)             |                      |
| <b>No</b>                                | 2066 (61)                  | 1819 (68)             | 247 (35)             | <0.0001              |
| <b>Unknown</b>                           | 605 (18)                   | 522 (20)              | 83 (11)              |                      |
| <b>CVA as cause of death</b>             | 1129 (33)                  | 686 (26)              | 443 (62)             | <0.0001              |
| <b>Serum creatinine:</b>                 |                            |                       |                      |                      |
| <b>mg/dl</b>                             | 0.79 (0.60-1.00)           | 0.79 (0.60-1.00)      | 0.78 (0.60-0.97)     | 0.09                 |
| <b>&gt;1.5 mg/dl</b>                     | 124 (3.7)                  | 97 (3.6)              | 27 (3.8)             | 0.82                 |
| <b>Diabetes:</b>                         |                            |                       |                      |                      |
| <b>Yes</b>                               | 29 (1)                     | 16 (1)                | 13 (2)               |                      |
| <b>No</b>                                | 2433 (64)                  | 1891 (71)             | 542 (76)             | 0.002                |
| <b>Unknown</b>                           | 1346 (35)                  | 759 (28)              | 161 (22)             |                      |
| <b>Deceased donor type:</b>              |                            |                       |                      |                      |
| <b>DBD</b>                               |                            | 2270 (85)             | 637 (89)             |                      |
| <b>DCD</b>                               |                            | 396 (15)              | 79 (11)              | 0.009                |
| <b>KDRI<sup>a</sup></b>                  |                            | 1.08 (0.92-1.27)      | 1.67 (1.56-1.92)     | <0.0001              |
| <b>CIT (hours), mean<br/>(SD)</b>        |                            | 14.6 (4.8)            | 13.9 (4.9)           | 0.001                |
| <b>HLA mismatches 0-6,<br/>mean (SD)</b> |                            | 2.3 (1.1)             | 2.8 (1.3)            | <0.0001              |

**Supplementary table 2: Median waiting time for recipients of a SCD or ECD transplants, according to age category, and corresponding mortality during median waiting time.**

| <b>Age category</b> | <b>Donor type</b> | <b>Median waiting time (months)</b> | <b>Mortality during median waiting time, % (95 % CI)</b> |
|---------------------|-------------------|-------------------------------------|----------------------------------------------------------|
| <b>≥20 - 44</b>     | SCD               | 20,2                                | 99.1 (98.8-99.4)                                         |
|                     | ECD               | 16,5                                | 99.3 (99.1-99.6)                                         |
| <b>≥45 - 64</b>     | SCD               | 15,0                                | 98.1 (97.5-98.6)                                         |
|                     | ECD               | 15,9                                | 97.9 (97.4-98.5)                                         |
| <b>≥65</b>          | SCD               | 7.1                                 | 98.6 (98.0 -99.2)                                        |
|                     | ECD               | 10,9                                | 97.8 (97.0-98.6)                                         |

Mortality was calculated by Cox regression analysis adjusted for age, sex, diabetes as primary renal disease (for more details: see methods section).
